# Supplementary material
Source: publisher site journal article supplement (https://www.dovepress.com/article/390635)
Supplement: Supplementary file 1 [file get_supplementary_file.php]

## Part1: Mortality-related risk factors of CRE infections

### 1. Search strategy for Embase

- #1 'carbapenem-resistant enterobacteriaceae'/exp (3570)
- #2 'carbapenemase-producing enterobacteriaceae':ab,ti,kw OR 'carbapenem resistant klebsiella pneumoniae':ab,ti,kw OR 'carbapenem resistant escherichia coli':ab,ti,kw (2562)
- #3 #1 OR #2 (5189)
- #4 'mortality'/exp (1243038)
- #5 'mortalities':ab,ti,kw OR 'case fatality rate':ab,ti,kw OR 'case fatality rates':ab,ti,kw OR 'rate, case fatality':ab,ti,kw OR 'rates, case fatality':ab,ti,kw OR 'cfr case fatality rate':ab,ti,kw OR 'crude death rate':ab,ti,kw OR 'crude death rates':ab,ti,kw OR 'death rate, crude':ab,ti,kw OR 'rate, crude death':ab,ti,kw OR 'crude mortality rate':ab,ti,kw OR 'crude mortality rates':ab,ti,kw OR 'mortality rate, crude':ab,ti,kw OR 'rate, crude mortality':ab,ti,kw OR 'death rate':ab,ti,kw OR 'death rates':ab,ti,kw OR 'rate, death':ab,ti,kw OR 'mortality rate':ab,ti,kw OR 'mortality rates':ab,ti,kw OR 'rate, mortality':ab,ti,kw OR 'mortality, excess':ab,ti,kw OR 'excess mortality':ab,ti,kw OR 'excess mortalities':ab,ti,kw OR 'decline, mortality':ab,ti,kw OR 'mortality declines':ab,ti,kw OR 'mortality decline':ab,ti,kw OR 'mortality determinants':ab,ti,kw OR 'determinants, mortality':ab,ti,kw OR 'determinant, mortality':ab,ti,kw OR 'mortality determinant':ab,ti,kw OR 'mortality, differential':ab,ti,kw OR 'differential mortality':ab,ti,kw OR 'differential mortalities':ab,ti,kw OR 'age-specific death rate':ab,ti,kw OR 'age-specific death rates':ab,ti,kw OR 'death rate, age-specific':ab,ti,kw OR 'rate, age-specific death':ab,ti,kw OR 'age specific death rate':ab,ti,kw (576929)
- #6 #4 OR #5 (1425807)
- #7 'risk factor'/exp (1181016)
- #8 'factor, risk':ab,ti,kw OR 'risk factor':ab,ti,kw OR 'social risk factors':ab,ti,kw OR 'factor, social risk':ab,ti,kw OR 'factors, social risk':ab,ti,kw OR 'risk factor, social':ab,ti,kw OR 'risk factors, social':ab,ti,kw OR 'social risk factor':ab,ti,kw OR 'health correlates':ab,ti,kw OR 'correlates, health':ab,ti,kw OR 'population at risk':ab,ti,kw OR 'populations at risk':ab,ti,kw OR 'risk scores':ab,ti,kw OR 'risk score':ab,ti,kw OR 'score, risk':ab,ti,kw OR 'risk factor scores':ab,ti,kw OR 'risk factor score':ab,ti,kw OR 'score, risk factor':ab,ti,kw (414972)
- #9 #7 OR #8 (1364628)
- #10 #3 AND #6 AND #9 (279)

### 2. Search strategy for PubMed

- #1 "Carbapenem-Resistant Enterobacteriaceae"[Mesh] (1,098)
- #2 Carbapenemase-Producing Enterobacteriaceae[Title/Abstract] (1001)
- #3 #1 OR #2 (1825)
- #4 "Mortality"[Mesh] (413285)
- #5 (Mortalities[Title/Abstract]) OR (Case Fatality Rate[Title/Abstract]) OR (Case Fatality Rates[Title/Abstract]) OR (Rate, Case Fatality[Title/Abstract]) OR (Rates, Case Fatality[Title/Abstract]) OR (CFR Case Fatality Rate[Title/Abstract]) OR (Crude Death Rate[Title/Abstract]) OR (Crude Death Rates[Title/Abstract]) OR (Death Rate, Crude[Title/Abstract]) OR (Rate, Crude Death[Title/Abstract]) OR (Crude Mortality Rate[Title/Abstract]) OR (Crude Mortality Rates[Title/Abstract]) OR (Mortality Rate, Crude[Title/Abstract]) OR (Rate, Crude Mortality[Title/Abstract]) OR (Death Rate[Title/Abstract]) OR (Death Rates[Title/Abstract]) OR (Rate, Death[Title/Abstract]) OR (Mortality Rate[Title/Abstract]) OR (Mortality Rates[Title/Abstract]) OR (Rate, Mortality[Title/Abstract]) OR (Mortality, Excess[Title/Abstract]) OR (Excess Mortality[Title/Abstract]) OR (Excess Mortalities[Title/Abstract]) OR (Decline, Mortality[Title/Abstract]) OR (Mortality Declines[Title/Abstract])

OR (Mortality Decline[Title/Abstract]) OR (Mortality Determinants[Title/Abstract]) OR (Determinants, Mortality[Title/Abstract]) OR (Determinant, Mortality[Title/Abstract]) OR (Mortality Determinant[Title/Abstract]) OR (Mortality, Differential[Title/Abstract]) OR (Differential Mortality[Title/Abstract]) OR (Differential Mortalities[Title/Abstract]) OR (Age-Specific Death Rate[Title/Abstract]) OR (Age-Specific Death Rates[Title/Abstract]) OR (Death Rate, Age-Specific[Title/Abstract]) OR (Rate, Age-Specific Death[Title/Abstract]) OR (Age Specific Death Rate[Title/Abstract]) (523090)

#6 #4 OR #5 (829593)

#7 "Risk Factors"[Mesh] (908930)

#8 (Factor, Risk[Title/Abstract]) OR (Risk Factor[Title/Abstract]) OR (Social Risk Factors[Title/Abstract]) OR (Factor, Social Risk[Title/Abstract]) OR (Factors, Social Risk[Title/Abstract]) OR (Risk Factor, Social[Title/Abstract]) OR (Risk Factors, Social[Title/Abstract]) OR (Social Risk Factor[Title/Abstract]) OR (Health Correlates[Title/Abstract]) OR (Correlates, Health[Title/Abstract]) OR (Population at Risk[Title/Abstract]) OR (Populations at Risk[Title/Abstract]) OR (Risk Scores[Title/Abstract]) OR (Risk Score[Title/Abstract]) OR (Score, Risk[Title/Abstract]) OR (Risk Factor Scores[Title/Abstract]) OR (Risk Factor Score[Title/Abstract]) OR (Score, Risk Factor[Title/Abstract]) ( 272301)

#9 #7 OR #8 (1062609)

#10 #3 OR #6 OR #9 (54)

#11 "Carbapenems"[Mesh] (13245)

#12 (Antibiotics, Carbapenem[Title/Abstract]) OR (Carbapenem Antibiotics[Title/Abstract]) OR (Carbapenem[Title/Abstract]) (11573)

#13 #11 OR #12

#14 "Drug Resistance"[Mesh] (357992)

#15 Resistance, Drug[Title/Abstract] (310)

#16 #14 OR #15

#17 "Klebsiella pneumoniae"[Mesh] (15992)

#18 (((Hyalococcus pneumoniae[Title/Abstract]) OR (Klebsiella pneumoniae aerogenes[Title/Abstract])) OR (Bacillus pneumoniae[Title/Abstract])) OR (Bacterium pneumoniae crouposae[Title/Abstract])) OR (Klebsiella rhinoscleromatis[Title/Abstract]) (25002)

#19 #17 OR #18 (28495)

#20 #13 AND #16 AND #19 AND #6 AND #9 (99)

#21 "Escherichia coli"[Mesh] (292398)

#22 (Enterococcus coli[Title/Abstract]) OR (Bacterium coli commune[Title/Abstract]) OR (E coli[Title/Abstract]) OR (Bacillus coli[Title/Abstract]) OR (Bacterium coli[Title/Abstract]) OR (Alkalescens-Dispar Group[Title/Abstract]) OR (Enteroinvasive Escherichia coli[Title/Abstract]) OR (Enteroinvasive E. coli[Title/Abstract]) OR (Diffusely Adherent Escherichia coli[Title/Abstract]) OR (Diffusely Adherent E. coli[Title/Abstract]) OR (Enteroaggregative Escherichia coli[Title/Abstract]) OR (EAggEC[Title/Abstract]) OR (Enteroaggregative E. coli[Title/Abstract]) (149884)

#23 #21 OR #22 (340975)

#24 #23 AND #16 AND #19 AND #6 AND #9 (19)

#25 #10 OR #20 OR #24 (152)

### 3. Risk of bias for case-control studies

| Study            | Selection              |                                 |                       |                        | Comparability | Exposure                  |                         |                   | Total Score |
|------------------|------------------------|---------------------------------|-----------------------|------------------------|---------------|---------------------------|-------------------------|-------------------|-------------|
|                  | Definition of the case | Representativeness of the cases | Selection of controls | Definition of controls |               | Ascertainment of exposure | Method of ascertainment | Non-Response rate |             |
| Balkan 2014      | 1                      | 1                               | 0                     | 1                      | 1             | 1                         | 1                       | 1                 | 7           |
| Zuo 2020         | 0                      | 1                               | 0                     | 1                      | 2             | 1                         | 1                       | 0                 | 6           |
| Zhang 2021       | 1                      | 1                               | 0                     | 1                      | 2             | 1                         | 1                       | 0                 | 7           |
| Tian 2020        | 1                      | 1                               | 0                     | 1                      | 2             | 1                         | 1                       | 0                 | 7           |
| Mora-Guzmán 2021 | 1                      | 1                               | 0                     | 1                      | 1             | 1                         | 1                       | 0                 | 6           |
| Li 2020          | 1                      | 1                               | 0                     | 1                      | 2             | 1                         | 1                       | 0                 | 7           |

### 4. Risk of bias for cohort studies

| Study                 | Selection      |                    |                           |                     | Comparability | Exposure              |                     |                       | Total Score |
|-----------------------|----------------|--------------------|---------------------------|---------------------|---------------|-----------------------|---------------------|-----------------------|-------------|
|                       | Exposed cohort | Non exposed cohort | Ascertainment of exposure | Outcome of interest |               | Assessment of outcome | Length of follow-up | Adequacy of follow up |             |
| Tuon 2017             | 0              | 1                  | 1                         | 1                   | 2             | 1                     | 0                   | 0                     | 6           |
| Capone 2013           | 0              | 1                  | 1                         | 1                   | 2             | 1                     | 0                   | 0                     | 6           |
| Chang 2014            | 0              | 1                  | 1                         | 1                   | 2             | 1                     | 0                   | 0                     | 6           |
| Su 2018               | 1              | 1                  | 1                         | 1                   | 2             | 1                     | 0                   | 0                     | 7           |
| Shen 2020             | 1              | 1                  | 1                         | 1                   | 2             | 1                     | 0                   | 0                     | 7           |
| Fang 2021             | 1              | 1                  | 1                         | 1                   | 1             | 1                     | 0                   | 0                     | 6           |
| Lin 2019              | 1              | 1                  | 1                         | 1                   | 2             | 1                     | 0                   | 0                     | 7           |
| Zhou 2021             | 1              | 1                  | 1                         | 1                   | 2             | 1                     | 1                   | 0                     | 8           |
| Falcone 2016          | 0              | 1                  | 1                         | 1                   | 1             | 1                     | 0                   | 0                     | 5           |
| Bar-Yoseph 2019       | 0              | 1                  | 1                         | 1                   | 1             | 1                     | 1                   | 0                     | 6           |
| Andrey 2020           | 1              | 1                  | 1                         | 1                   | 2             | 1                     | 0                   | 0                     | 7           |
| Di Domenico 2020      | 0              | 1                  | 1                         | 1                   | 1             | 1                     | 0                   | 0                     | 5           |
| Chotiprasitsakul 2018 | 1              | 1                  | 1                         | 1                   | 2             | 1                     | 0                   | 0                     | 7           |
| Wang 2019             | 1              | 1                  | 1                         | 1                   | 2             | 1                     | 0                   | 0                     | 7           |
| Liu 2021              | 1              | 1                  | 1                         | 1                   | 2             | 1                     | 0                   | 0                     | 7           |
| Palacios-Baena 2016   | 1              | 1                  | 1                         | 1                   | 2             | 1                     | 1                   | 0                     | 8           |
| Seo 2020              | 1              | 1                  | 1                         | 1                   | 2             | 1                     | 0                   | 0                     | 7           |
| Li 2019               | 1              | 1                  | 1                         | 1                   | 2             | 1                     | 0                   | 0                     | 7           |
| Chen 2021             | 1              | 1                  | 1                         | 1                   | 2             | 1                     | 0                   | 0                     | 7           |
| Lim 2020              | 1              | 1                  | 1                         | 1                   | 2             | 1                     | 0                   | 0                     | 7           |
| Rivera-Espinar 2020   | 0              | 1                  | 1                         | 1                   | 2             | 1                     | 0                   | 0                     | 6           |
| Brescini 2019         | 1              | 1                  | 1                         | 1                   | 2             | 1                     | 0                   | 0                     | 7           |
| Lin 2015              | 1              | 1                  | 1                         | 1                   | 2             | 1                     | 0                   | 0                     | 7           |
| Cristina 2018         | 1              | 1                  | 1                         | 1                   | 2             | 1                     | 0                   | 0                     | 7           |
| Geng 2018             | 0              | 1                  | 1                         | 1                   | 2             | 1                     | 0                   | 0                     | 6           |
| Tumbarello 2015       | 1              | 1                  | 1                         | 1                   | 2             | 1                     | 0                   | 0                     | 7           |
| Lee 2020              | 1              | 1                  | 1                         | 1                   | 2             | 0                     | 0                   | 0                     | 6           |

## Part2: Antimicrobial regimens of CRE infections

### Search strategy for PubMed

- #1 "Carbapenem-Resistant Enterobacteriaceae"[Mesh] (1134)
- #2 (Carbapenemase-Producing Enterobacteriaceae[Title/Abstract]) OR (carbapenem resistant Klebsiella pneumoniae[Title/Abstract]) OR (carbapenem resistant Escherichia coli[Title/Abstract]) (2138)
- #3 #1 OR #2 (2801)
- #4 "Anti-Bacterial Agents"[Mesh] (415523)
- #5 (Agents, Anti-Bacterial[Title/Abstract]) OR (Anti Bacterial Agents[Title/Abstract]) OR (Antibacterial Agents[Title/Abstract]) OR (Agents, Antibacterial[Title/Abstract]) OR (Antibacterial Agent[Title/Abstract]) OR (Agent, Antibacterial[Title/Abstract]) OR (Anti-Bacterial Compounds[Title/Abstract]) OR (Anti Bacterial Compounds[Title/Abstract]) OR (Compounds, Anti-Bacterial[Title/Abstract]) OR (Anti-Bacterial Agent[Title/Abstract]) OR (Agent, Anti-Bacterial[Title/Abstract]) OR (Anti Bacterial Agent[Title/Abstract]) OR (Anti-Bacterial Compound[Title/Abstract]) OR (Anti Bacterial Compound[Title/Abstract]) OR (Compound, Anti-Bacterial[Title/Abstract]) OR (Bacteriocidal Agents[Title/Abstract]) OR (Agents, Bacteriocidal[Title/Abstract]) OR (Bacteriocidal Agent[Title/Abstract]) OR (Agent, Bacteriocidal[Title/Abstract]) OR (Bacteriocide[Title/Abstract]) OR (Bacteriocides[Title/Abstract]) OR (Anti-Mycobacterial Agents[Title/Abstract]) OR (Agents, Anti-Mycobacterial[Title/Abstract]) OR (Anti Mycobacterial Agents[Title/Abstract]) OR (Anti-Mycobacterial Agent[Title/Abstract]) OR (Agent, Anti-Mycobacterial[Title/Abstract]) OR (Anti Mycobacterial Agent[Title/Abstract]) OR (Antimycobacterial Agent[Title/Abstract]) OR (Agent, Antimycobacterial[Title/Abstract]) OR (Antimycobacterial Agents[Title/Abstract]) OR (Agents, Antimycobacterial[Title/Abstract]) OR (Antibiotics[Title/Abstract]) OR (Antibiotic[Title/Abstract]) (400711)
- #6 #4 OR #5 (629956)
- #7 "Therapeutics"[Mesh] (4932005)
- #8 (Therapeutic[Title/Abstract]) OR (Therapy[Title/Abstract]) OR (Therapies[Title/Abstract]) OR (Treatment[Title/Abstract]) OR (Treatments[Title/Abstract]) (6762326)
- #9 #7 OR #8 (9709162)
- #10 "Infections"[Mesh] (2887102)
- #11 (Infection and Infestation[Title/Abstract]) OR (Infestation and Infection[Title/Abstract]) OR (Infections and Infestations[Title/Abstract]) OR (Infestations and Infections[Title/Abstract]) OR (Infection[Title/Abstract]) (1255001)
- #12 #10 OR #11 (3340695)
- #13 #3 AND #6 AND #9 AND #12 NOT (review[Publication Type]) (632)
